# Supplementary material
Source: publisher site journal article supplement (https://www.dovepress.com/article/430131)
Supplement: Supplementary file 1 [file get_supplementary_file.php]

## Supplemental Table S1

### Interactions between differentially expressed circRNAs and miRNAs

| mRNA             | miRNA                        | TargetScan_score | miranda_Energy |
|------------------|------------------------------|------------------|----------------|
| hsa_circ_0069244 | hsa-let-7f-5p                | 96               | -21.72         |
| hsa_circ_0035114 | hsa-miR-10399-3p_L+1_1ss22CT | 96               | -43.90         |
| hsa_circ_0064229 | hsa-miR-10399-3p_L+1_1ss22CT | 98               | -42.31         |
| hsa_circ_0069244 | hsa-miR-10399-3p_L+1_1ss22CT | 95               | -20.62         |
| hsa_circ_0088216 | hsa-miR-10399-3p_L+1_1ss22CT | 90               | -24.80         |
| hsa_circ_0003737 | hsa-miR-10527-5p_R+1         | 90               | -24.05         |
| hsa_circ_0005919 | hsa-miR-10527-5p_R+1         | 97               | -20.38         |
| hsa_circ_0028023 | hsa-miR-10527-5p_R+1         | 95               | -20.19         |
| hsa_circ_0033841 | hsa-miR-10527-5p_R+1         | 96               | -155.10        |
| hsa_circ_0056229 | hsa-miR-10527-5p_R+1         | 99               | -20.94         |
| hsa_circ_0065041 | hsa-miR-10527-5p_R+1         | 91               | -21.04         |
| hsa_circ_0013388 | hsa-miR-106a-5p_1ss1AC       | 94               | -50.48         |
| hsa_circ_0027737 | hsa-miR-106a-5p_1ss1AC       | 91               | -40.40         |
| hsa_circ_0033841 | hsa-miR-106a-5p_1ss1AC       | 92               | -216.96        |
| hsa_circ_0036205 | hsa-miR-106a-5p_1ss1AC       | 96               | -26.84         |
| hsa_circ_0050479 | hsa-miR-106a-5p_1ss1AC       | 90               | -28.68         |
| hsa_circ_0050488 | hsa-miR-106a-5p_1ss1AC       | 90               | -28.68         |
| hsa_circ_0013388 | hsa-miR-106b-5p              | 94               | -41.54         |
| hsa_circ_0027737 | hsa-miR-106b-5p              | 96               | -20.25         |
| hsa_circ_0033841 | hsa-miR-106b-5p              | 92               | -147.59        |
| hsa_circ_0036205 | hsa-miR-106b-5p              | 95               | -23.71         |
| hsa_circ_0050479 | hsa-miR-106b-5p              | 91               | -24.60         |
| hsa_circ_0050488 | hsa-miR-106b-5p              | 91               | -24.60         |
| hsa_circ_0033841 | hsa-miR-127-5p_R+1           | 94               | -590.21        |
| hsa_circ_0046927 | hsa-miR-127-5p_R+1           | 93               | -41.97         |
| hsa_circ_0059627 | hsa-miR-127-5p_R+1           | 95               | -20.94         |
| hsa_circ_0064627 | hsa-miR-127-5p_R+1           | 91               | -20.57         |
| hsa_circ_0003737 | hsa-miR-130a-3p              | 91               | -40.48         |
| hsa_circ_0058159 | hsa-miR-130a-3p              | 95               | -21.03         |
| hsa_circ_0033841 | hsa-miR-130b-3p              | 91               | -94.63         |
| hsa_circ_0084956 | hsa-miR-130b-3p              | 98               | -20.55         |
| hsa_circ_0015438 | hsa-miR-133a-3p_R+1          | 91               | -22.63         |
| hsa_circ_0030465 | hsa-miR-133a-3p_R+1          | 90               | -32.96         |
| hsa_circ_0036434 | hsa-miR-133a-3p_R+1          | 97               | -20.79         |
| hsa_circ_0071605 | hsa-miR-133a-3p_R+1          | 96               | -21.39         |
| hsa_circ_0001760 | hsa-miR-145-5p               | 93               | -72.54         |
| hsa_circ_0003737 | hsa-miR-145-5p               | 92               | -91.67         |
| hsa_circ_0007119 | hsa-miR-145-5p               | 98               | -22.09         |
| hsa_circ_0013026 | hsa-miR-145-5p               | 98               | -53.96         |
| hsa_circ_0034976 | hsa-miR-145-5p               | 91               | -20.94         |
| hsa_circ_0039343 | hsa-miR-145-5p               | 96               | -23.00         |
| hsa_circ_0042323 | hsa-miR-145-5p               | 97               | -42.18         |
| hsa_circ_0046782 | hsa-miR-145-5p               | 90               | -43.87         |
| hsa_circ_0056229 | hsa-miR-145-5p               | 96               | -128.07        |
| hsa_circ_0067585 | hsa-miR-145-5p               | 99               | -20.32         |

|                  |                     |    |         |
|------------------|---------------------|----|---------|
| hsa_circ_0069740 | hsa-miR-145-5p      | 95 | -21.09  |
| hsa_circ_0085470 | hsa-miR-145-5p      | 91 | -24.03  |
| hsa_circ_0086047 | hsa-miR-145-5p      | 94 | -21.83  |
| hsa_circ_0087868 | hsa-miR-145-5p      | 95 | -24.64  |
| hsa_circ_0032496 | hsa-miR-150-3p_R-1  | 95 | -50.06  |
| hsa_circ_0040671 | hsa-miR-150-3p_R-1  | 93 | -23.84  |
| hsa_circ_0042323 | hsa-miR-150-3p_R-1  | 94 | -28.88  |
| hsa_circ_0051024 | hsa-miR-150-3p_R-1  | 97 | -21.03  |
| hsa_circ_0064229 | hsa-miR-150-3p_R-1  | 98 | -26.08  |
| hsa_circ_0083737 | hsa-miR-150-3p_R-1  | 93 | -20.05  |
| hsa_circ_0088223 | hsa-miR-150-3p_R-1  | 96 | -51.76  |
| hsa_circ_0049673 | hsa-miR-151b_R+3    | 92 | -20.65  |
| hsa_circ_0003737 | hsa-miR-15a-5p      | 91 | -25.13  |
| hsa_circ_0012339 | hsa-miR-15a-5p      | 99 | -20.81  |
| hsa_circ_0033841 | hsa-miR-15a-5p      | 93 | -258.05 |
| hsa_circ_0051557 | hsa-miR-15a-5p      | 92 | -42.63  |
| hsa_circ_0052609 | hsa-miR-15a-5p      | 97 | -21.38  |
| hsa_circ_0059275 | hsa-miR-15a-5p      | 92 | -20.03  |
| hsa_circ_0059627 | hsa-miR-15a-5p      | 91 | -20.21  |
| hsa_circ_0070737 | hsa-miR-15a-5p      | 95 | -21.44  |
| hsa_circ_0003737 | hsa-miR-15b-5p      | 91 | -48.15  |
| hsa_circ_0033841 | hsa-miR-15b-5p      | 93 | -221.37 |
| hsa_circ_0053367 | hsa-miR-15b-5p      | 93 | -21.49  |
| hsa_circ_0059627 | hsa-miR-15b-5p      | 94 | -24.28  |
| hsa_circ_0085194 | hsa-miR-15b-5p      | 96 | -24.29  |
| hsa_circ_0013388 | hsa-miR-17-5p       | 94 | -50.48  |
| hsa_circ_0027737 | hsa-miR-17-5p       | 91 | -40.40  |
| hsa_circ_0033841 | hsa-miR-17-5p       | 92 | -216.96 |
| hsa_circ_0036205 | hsa-miR-17-5p       | 96 | -26.84  |
| hsa_circ_0050479 | hsa-miR-17-5p       | 90 | -28.68  |
| hsa_circ_0050488 | hsa-miR-17-5p       | 90 | -28.68  |
| hsa_circ_0004902 | hsa-miR-196b-5p_R-1 | 96 | -23.42  |
| hsa_circ_0033841 | hsa-miR-196b-5p_R-1 | 94 | -238.42 |
| hsa_circ_0003737 | hsa-miR-20a-3p_R+1  | 93 | -24.75  |
| hsa_circ_0033841 | hsa-miR-20a-3p_R+1  | 91 | -41.48  |
| hsa_circ_0059312 | hsa-miR-20a-3p_R+1  | 92 | -20.01  |
| hsa_circ_0013388 | hsa-miR-20a-5p      | 95 | -46.26  |
| hsa_circ_0033841 | hsa-miR-20a-5p      | 92 | -157.07 |
| hsa_circ_0036205 | hsa-miR-20a-5p      | 93 | -22.74  |
| hsa_circ_0050479 | hsa-miR-20a-5p      | 90 | -25.03  |
| hsa_circ_0050488 | hsa-miR-20a-5p      | 90 | -25.03  |
| hsa_circ_0053633 | hsa-miR-20a-5p      | 97 | -20.48  |
| hsa_circ_0013388 | hsa-miR-20b-5p      | 95 | -50.48  |
| hsa_circ_0027737 | hsa-miR-20b-5p      | 96 | -20.27  |
| hsa_circ_0028023 | hsa-miR-20b-5p      | 92 | -20.07  |
| hsa_circ_0033841 | hsa-miR-20b-5p      | 92 | -259.90 |
| hsa_circ_0036205 | hsa-miR-20b-5p      | 93 | -22.48  |
| hsa_circ_0050479 | hsa-miR-20b-5p      | 90 | -24.82  |
| hsa_circ_0050488 | hsa-miR-20b-5p      | 90 | -24.82  |
| hsa_circ_0033841 | hsa-miR-223-3p_R+1  | 92 | -89.97  |
| hsa_circ_0033841 | hsa-miR-22-5p       | 98 | -116.54 |
| hsa_circ_0086999 | hsa-miR-22-5p       | 93 | -21.16  |

|                  |                     |    |          |
|------------------|---------------------|----|----------|
| hsa_circ_0090057 | hsa-miR-22-5p       | 95 | -20.46   |
| hsa_circ_0005873 | hsa-miR-23b-5p      | 95 | -48.22   |
| hsa_circ_0026329 | hsa-miR-23b-5p      | 93 | -43.77   |
| hsa_circ_0027276 | hsa-miR-23b-5p      | 97 | -20.85   |
| hsa_circ_0033841 | hsa-miR-23b-5p      | 92 | -1065.21 |
| hsa_circ_0035500 | hsa-miR-23b-5p      | 96 | -21.93   |
| hsa_circ_0038714 | hsa-miR-23b-5p      | 91 | -46.23   |
| hsa_circ_0048820 | hsa-miR-23b-5p      | 97 | -47.57   |
| hsa_circ_0053367 | hsa-miR-23b-5p      | 93 | -22.10   |
| hsa_circ_0061698 | hsa-miR-23b-5p      | 91 | -24.28   |
| hsa_circ_0061803 | hsa-miR-23b-5p      | 92 | -45.64   |
| hsa_circ_0077142 | hsa-miR-23b-5p      | 95 | -22.21   |
| hsa_circ_0003737 | hsa-miR-24-3p       | 96 | -41.21   |
| hsa_circ_0007119 | hsa-miR-24-3p       | 92 | -61.35   |
| hsa_circ_0008193 | hsa-miR-24-3p       | 93 | -21.36   |
| hsa_circ_0009516 | hsa-miR-24-3p       | 90 | -20.36   |
| hsa_circ_0015476 | hsa-miR-24-3p       | 99 | -23.14   |
| hsa_circ_0027276 | hsa-miR-24-3p       | 96 | -21.34   |
| hsa_circ_0029362 | hsa-miR-24-3p       | 91 | -26.64   |
| hsa_circ_0033841 | hsa-miR-24-3p       | 95 | -1051.47 |
| hsa_circ_0041122 | hsa-miR-24-3p       | 96 | -46.29   |
| hsa_circ_0043366 | hsa-miR-24-3p       | 98 | -22.31   |
| hsa_circ_0045191 | hsa-miR-24-3p       | 92 | -23.61   |
| hsa_circ_0052922 | hsa-miR-24-3p       | 94 | -22.61   |
| hsa_circ_0053467 | hsa-miR-24-3p       | 94 | -61.68   |
| hsa_circ_0053574 | hsa-miR-24-3p       | 97 | -61.68   |
| hsa_circ_0053681 | hsa-miR-24-3p       | 94 | -87.83   |
| hsa_circ_0059275 | hsa-miR-24-3p       | 90 | -20.59   |
| hsa_circ_0060565 | hsa-miR-24-3p       | 97 | -20.14   |
| hsa_circ_0060913 | hsa-miR-24-3p       | 98 | -26.99   |
| hsa_circ_0063606 | hsa-miR-24-3p       | 97 | -47.15   |
| hsa_circ_0070161 | hsa-miR-24-3p       | 91 | -42.85   |
| hsa_circ_0079713 | hsa-miR-24-3p       | 95 | -21.98   |
| hsa_circ_0080774 | hsa-miR-24-3p       | 98 | -23.25   |
| hsa_circ_0082319 | hsa-miR-24-3p       | 90 | -28.27   |
| hsa_circ_0003737 | hsa-miR-26a-1-3p    | 90 | -20.33   |
| hsa_circ_0033841 | hsa-miR-26a-1-3p    | 91 | -88.66   |
| hsa_circ_0001760 | hsa-miR-28-5p_R-1   | 97 | -24.61   |
| hsa_circ_0007119 | hsa-miR-28-5p_R-1   | 97 | -65.45   |
| hsa_circ_0010268 | hsa-miR-28-5p_R-1   | 92 | -21.61   |
| hsa_circ_0033841 | hsa-miR-28-5p_R-1   | 95 | -188.71  |
| hsa_circ_0058608 | hsa-miR-28-5p_R-1   | 95 | -43.56   |
| hsa_circ_0088223 | hsa-miR-28-5p_R-1   | 93 | -20.77   |
| hsa_circ_0014179 | hsa-miR-29c-3p_R-1  | 92 | -20.41   |
| hsa_circ_0033841 | hsa-miR-29c-3p_R-1  | 96 | -105.05  |
| hsa_circ_0035237 | hsa-miR-301a-3p     | 99 | -20.88   |
| hsa_circ_0001760 | hsa-miR-3074-5p_R+1 | 90 | -41.77   |
| hsa_circ_0009445 | hsa-miR-3074-5p_R+1 | 94 | -23.75   |
| hsa_circ_0012780 | hsa-miR-3074-5p_R+1 | 98 | -22.63   |
| hsa_circ_0033013 | hsa-miR-3074-5p_R+1 | 94 | -22.28   |
| hsa_circ_0033841 | hsa-miR-3074-5p_R+1 | 92 | -735.24  |
| hsa_circ_0034283 | hsa-miR-3074-5p_R+1 | 98 | -20.25   |

|                  |                           |    |          |
|------------------|---------------------------|----|----------|
| hsa_circ_0047727 | hsa-miR-3074-5p_R+1       | 92 | -21.38   |
| hsa_circ_0053467 | hsa-miR-3074-5p_R+1       | 91 | -25.23   |
| hsa_circ_0069157 | hsa-miR-3074-5p_R+1       | 93 | -22.75   |
| hsa_circ_0071661 | hsa-miR-3074-5p_R+1       | 91 | -27.54   |
| hsa_circ_0075640 | hsa-miR-3074-5p_R+1       | 97 | -29.75   |
| hsa_circ_0075847 | hsa-miR-3074-5p_R+1       | 95 | -23.66   |
| hsa_circ_0091368 | hsa-miR-3074-5p_R+1       | 97 | -23.43   |
| hsa_circ_0005873 | hsa-miR-30b-3p            | 92 | -23.60   |
| hsa_circ_0007346 | hsa-miR-30b-3p            | 96 | -76.94   |
| hsa_circ_0014371 | hsa-miR-30b-3p            | 98 | -44.28   |
| hsa_circ_0014391 | hsa-miR-30b-3p            | 99 | -44.28   |
| hsa_circ_0014421 | hsa-miR-30b-3p            | 99 | -23.18   |
| hsa_circ_0030392 | hsa-miR-30b-3p            | 94 | -21.92   |
| hsa_circ_0033841 | hsa-miR-30b-3p            | 96 | -1679.56 |
| hsa_circ_0037542 | hsa-miR-30b-3p            | 92 | -150.10  |
| hsa_circ_0037817 | hsa-miR-30b-3p            | 91 | -44.27   |
| hsa_circ_0038547 | hsa-miR-30b-3p            | 98 | -22.10   |
| hsa_circ_0038572 | hsa-miR-30b-3p            | 97 | -28.56   |
| hsa_circ_0042154 | hsa-miR-30b-3p            | 95 | -42.92   |
| hsa_circ_0046118 | hsa-miR-30b-3p            | 93 | -22.38   |
| hsa_circ_0046927 | hsa-miR-30b-3p            | 95 | -23.58   |
| hsa_circ_0056229 | hsa-miR-30b-3p            | 91 | -276.89  |
| hsa_circ_0059275 | hsa-miR-30b-3p            | 94 | -45.99   |
| hsa_circ_0061803 | hsa-miR-30b-3p            | 98 | -22.45   |
| hsa_circ_0064229 | hsa-miR-30b-3p            | 96 | -45.18   |
| hsa_circ_0070737 | hsa-miR-30b-3p            | 93 | -165.89  |
| hsa_circ_0071342 | hsa-miR-30b-3p            | 90 | -25.89   |
| hsa_circ_0071605 | hsa-miR-30b-3p            | 93 | -42.30   |
| hsa_circ_0075792 | hsa-miR-30b-3p            | 92 | -21.10   |
| hsa_circ_0076133 | hsa-miR-30b-3p            | 95 | -48.85   |
| hsa_circ_0083737 | hsa-miR-30b-3p            | 94 | -23.06   |
| hsa_circ_0088216 | hsa-miR-30b-3p            | 92 | -22.97   |
| hsa_circ_0009474 | hsa-miR-3138_L-5R+2       | 97 | -23.33   |
| hsa_circ_0013344 | hsa-miR-3138_L-5R+2       | 96 | -75.33   |
| hsa_circ_0022764 | hsa-miR-3138_L-5R+2       | 99 | -24.22   |
| hsa_circ_0024554 | hsa-miR-3138_L-5R+2       | 93 | -27.53   |
| hsa_circ_0025325 | hsa-miR-3138_L-5R+2       | 98 | -20.96   |
| hsa_circ_0025793 | hsa-miR-3138_L-5R+2       | 95 | -20.45   |
| hsa_circ_0028023 | hsa-miR-3138_L-5R+2       | 99 | -21.39   |
| hsa_circ_0028236 | hsa-miR-3138_L-5R+2       | 92 | -93.49   |
| hsa_circ_0033841 | hsa-miR-3138_L-5R+2       | 95 | -1252.45 |
| hsa_circ_0038714 | hsa-miR-3138_L-5R+2       | 97 | -30.41   |
| hsa_circ_0038871 | hsa-miR-3138_L-5R+2       | 95 | -47.44   |
| hsa_circ_0043345 | hsa-miR-3138_L-5R+2       | 90 | -20.11   |
| hsa_circ_0070529 | hsa-miR-3138_L-5R+2       | 92 | -21.39   |
| hsa_circ_0086806 | hsa-miR-3138_L-5R+2       | 98 | -45.80   |
| hsa_circ_0003737 | hsa-miR-31-5p_R-1_1ss20CA | 94 | -64.18   |
| hsa_circ_0033841 | hsa-miR-31-5p_R-1_1ss20CA | 91 | -88.61   |
| hsa_circ_0038212 | hsa-miR-31-5p_R-1_1ss20CA | 92 | -21.93   |
| hsa_circ_0088987 | hsa-miR-31-5p_R-1_1ss20CA | 95 | -25.93   |
| hsa_circ_0014869 | hsa-miR-331-5p_R-2        | 94 | -24.97   |
| hsa_circ_0033841 | hsa-miR-331-5p_R-2        | 92 | -24.03   |

|                  |                       |    |         |
|------------------|-----------------------|----|---------|
| hsa_circ_0010343 | hsa-miR-424-5p_R-1    | 90 | -20.95  |
| hsa_circ_0028023 | hsa-miR-424-5p_R-1    | 90 | -21.04  |
| hsa_circ_0033841 | hsa-miR-424-5p_R-1    | 92 | -108.08 |
| hsa_circ_0034976 | hsa-miR-424-5p_R-1    | 97 | -22.46  |
| hsa_circ_0051557 | hsa-miR-424-5p_R-1    | 93 | -32.06  |
| hsa_circ_0056560 | hsa-miR-424-5p_R-1    | 90 | -21.03  |
| hsa_circ_0059627 | hsa-miR-424-5p_R-1    | 91 | -20.12  |
| hsa_circ_0070799 | hsa-miR-424-5p_R-1    | 96 | -20.30  |
| hsa_circ_0005894 | hsa-miR-450a-2-3p_L-1 | 97 | -21.70  |
| hsa_circ_0009700 | hsa-miR-450a-2-3p_L-1 | 97 | -20.19  |
| hsa_circ_0009701 | hsa-miR-450a-2-3p_L-1 | 92 | -20.19  |
| hsa_circ_0023190 | hsa-miR-450a-2-3p_L-1 | 95 | -21.20  |
| hsa_circ_0023598 | hsa-miR-450a-2-3p_L-1 | 94 | -23.52  |
| hsa_circ_0029823 | hsa-miR-450a-2-3p_L-1 | 91 | -20.64  |
| hsa_circ_0033627 | hsa-miR-450a-2-3p_L-1 | 90 | -21.91  |
| hsa_circ_0034976 | hsa-miR-450a-2-3p_L-1 | 94 | -21.27  |
| hsa_circ_0034986 | hsa-miR-450a-2-3p_L-1 | 98 | -21.27  |
| hsa_circ_0034991 | hsa-miR-450a-2-3p_L-1 | 98 | -21.27  |
| hsa_circ_0038590 | hsa-miR-450a-2-3p_L-1 | 99 | -22.15  |
| hsa_circ_0041881 | hsa-miR-450a-2-3p_L-1 | 97 | -20.98  |
| hsa_circ_0043336 | hsa-miR-450a-2-3p_L-1 | 92 | -20.34  |
| hsa_circ_0045372 | hsa-miR-450a-2-3p_L-1 | 92 | -24.78  |
| hsa_circ_0056229 | hsa-miR-450a-2-3p_L-1 | 93 | -64.50  |
| hsa_circ_0059312 | hsa-miR-450a-2-3p_L-1 | 90 | -22.41  |
| hsa_circ_0067562 | hsa-miR-450a-2-3p_L-1 | 93 | -20.12  |
| hsa_circ_0086047 | hsa-miR-450a-2-3p_L-1 | 91 | -20.20  |
| hsa_circ_0007119 | hsa-miR-4521_R+1      | 93 | -21.66  |
| hsa_circ_0024554 | hsa-miR-4521_R+1      | 90 | -21.65  |
| hsa_circ_0069784 | hsa-miR-4521_R+1      | 92 | -20.49  |
| hsa_circ_0082959 | hsa-miR-4521_R+1      | 91 | -42.09  |
| hsa_circ_0090255 | hsa-miR-4521_R+1      | 98 | -20.35  |
| hsa_circ_0003050 | hsa-miR-490-3p_R+1    | 92 | -24.86  |
| hsa_circ_0004902 | hsa-miR-490-3p_R+1    | 96 | -21.55  |
| hsa_circ_0033341 | hsa-miR-490-3p_R+1    | 97 | -21.00  |
| hsa_circ_0033841 | hsa-miR-490-3p_R+1    | 95 | -649.21 |
| hsa_circ_0042154 | hsa-miR-490-3p_R+1    | 98 | -44.75  |
| hsa_circ_0049673 | hsa-miR-490-3p_R+1    | 92 | -20.58  |
| hsa_circ_0067983 | hsa-miR-490-3p_R+1    | 99 | -24.06  |
| hsa_circ_0083774 | hsa-miR-490-3p_R+1    | 97 | -25.17  |
| hsa_circ_0003737 | hsa-miR-494-3p_R+1    | 91 | -62.64  |
| hsa_circ_0007299 | hsa-miR-494-3p_R+1    | 90 | -21.01  |
| hsa_circ_0012339 | hsa-miR-497-5p        | 99 | -22.54  |
| hsa_circ_0028023 | hsa-miR-497-5p        | 91 | -23.41  |
| hsa_circ_0033841 | hsa-miR-497-5p        | 92 | -510.00 |
| hsa_circ_0039785 | hsa-miR-497-5p        | 90 | -20.01  |
| hsa_circ_0059275 | hsa-miR-497-5p        | 92 | -42.40  |
| hsa_circ_0088223 | hsa-miR-497-5p        | 94 | -45.56  |
| hsa_circ_0090746 | hsa-miR-497-5p        | 95 | -24.80  |
| hsa_circ_0003737 | hsa-miR-505-3p_L-1R+2 | 93 | -47.77  |
| hsa_circ_0005779 | hsa-miR-505-3p_L-1R+2 | 98 | -21.79  |
| hsa_circ_0053467 | hsa-miR-505-3p_L-1R+2 | 97 | -26.90  |
| hsa_circ_0062231 | hsa-miR-505-3p_L-1R+2 | 92 | -20.42  |

|                  |                          |    |        |
|------------------|--------------------------|----|--------|
| hsa_circ_0076133 | hsa-miR-505-3p_L-1R+2    | 99 | -23.68 |
| hsa_circ_0077508 | hsa-miR-505-3p_L-1R+2    | 94 | -26.89 |
| hsa_circ_0046927 | hsa-miR-548ag_R+1_1ss4GA | 98 | -20.14 |
| hsa_circ_0077508 | hsa-miR-548au-5p         | 95 | -30.89 |
| hsa_circ_0077508 | hsa-miR-548o-5p          | 95 | -32.34 |
| hsa_circ_0003737 | hsa-miR-576-3p_R+1       | 92 | -20.48 |
| hsa_circ_0033841 | hsa-miR-576-3p_R+1       | 94 | -67.23 |

**Supplemental Table S2**  
The primer sequences of circRNAs

| <b>Gene</b>         | <b>Forward(5'-3')</b>          | <b>Reverse(5'-3')</b>         |
|---------------------|--------------------------------|-------------------------------|
| <b>U6</b>           | <b>GGAACGATACAGAGAAGATTAGC</b> | <b>TGGAACGCTTCACGAATTTGCG</b> |
| <b>circ_0009885</b> | <b>CTCACTGATGCCACACCATG</b>    | <b>CCCCTTCTCCACATTCCAGT</b>   |
| <b>circ_0066651</b> | <b>CTGAAAGCTGCATCTGTCTGT</b>   | <b>TATATGCCTGGCGGTAGAGC</b>   |
| <b>circ_0043753</b> | <b>TAGGACACACACAGGCTTGG</b>    | <b>GCAGCTCTTCCCCATGCTTA</b>   |
| <b>circ_0041881</b> | <b>GGTTACAGCTGATCCTCGGG</b>    | <b>CAGGATGCCCATGATCAGCT</b>   |
| <b>circ_0011760</b> | <b>TACTGCAGTGCCTTTTCCTC</b>    | <b>TCTTCATAGAACAGCTCCAGG</b>  |
| <b>circ_0032872</b> | <b>TTGGTGGAGCAGATCACTCT</b>    | <b>TGGCTGGTACAAATCCCAAGA</b>  |
| <b>circ_0061803</b> | <b>CCGAGTACATGCTGCAGAAG</b>    | <b>AGCCATCTCTGACACCTCG</b>    |
| <b>circ_0004716</b> | <b>CTCCAGCAACATCTTGTTCA</b>    | <b>TCCAGTTGCTAGGGATCTGT</b>   |
| <b>circ_0009445</b> | <b>CGTCCCCTTCAAGTTCCAGA</b>    | <b>GGTCATGTGTCTGTTTTCTTG</b>  |
| <b>circ_0075792</b> | <b>TTTTGGTCACGTTCTCCCA</b>     | <b>GGTACAGTGACTAATACCTGG</b>  |
